# Supplementary material
Source: publisher figshare collection journal article supplement (https://gsajournals.figshare.com/articles/dataset/_/8479022)
Supplement: Supplementary file 1 [file 1]

# Supplemental Tables and Figures: Wright et al.

| Coefficient        | Estimate | Std.Error | p value    |
|--------------------|----------|-----------|------------|
| Intercept          | 78.17    | 0.88      | 2.0E-16*** |
| Caucasus           | 1.90     | 2.07      | >0.05      |
| Native American    | -3.28    | 1.59      | 0.040      |
| Great Britain      | 2.73     | 0.89      | 0.002*     |
| Ireland            | 0.79     | 0.89      | >0.05      |
| Europe East        | 1.92     | 0.91      | 0.034      |
| Scandinavia        | 3.91     | 0.91      | 1.6E-05*** |
| Italy/Greece       | 3.50     | 0.96      | 2.6E-04**  |
| Europe West        | 3.21     | 0.89      | 3.2E-04*   |
| Iberian Peninsula  | 2.97     | 1.11      | 0.008      |
| European Jewish    | 2.74     | 0.93      | 0.003*     |
| Finland/NW Russia  | 2.33     | 1.21      | >0.05      |
| Sub-Saharan Africa | -0.38    | 0.93      | >0.05      |
| Near East          | 1.89     | 2.22      | >0.05      |
| Latino             | 1.21     | 0.91      | >0.05      |

r: 0.047  
 F-statistic: 24.57  
 df: 146153  
 p value: <2.2E-16

**S Table 1:** Correlation of Maternal Lifespan with Estimate of Ancestral Admixture. Multivariate linear regression analysis of ancestral admixture assignments of and paternal lifespan. Coefficient estimates and SE are in years. Ethnic group included in analysis if there were at least 1000 individuals with > 5% ancestral admixture assignment. Threshold for significance after Bonferroni correction for 14 ancestral admixture assignments was  $p < 3.57 \times 10^{-3}$  \*. \*\* $p < 1 \times 10^{-4}$ ; \*\*\*  $p < 1 \times 10^{-5}$ .

| Coefficient        | Estimate | Std.Error | p value    |
|--------------------|----------|-----------|------------|
| Intercept          | 74.57    | 0.70      | 2.0E-16*** |
| Caucasus           | -1.11    | 1.80      | >0.05      |
| Native American    | 0.11     | 1.35      | >0.05      |
| Great Britain      | -0.42    | 0.71      | >0.05      |
| Ireland            | -3.30    | 0.72      | 4.7E-06*** |
| Europe East        | -1.05    | 0.73      | >0.05      |
| Scandinavia        | 1.58     | 0.74      | 0.032      |
| Italy/Greece       | 1.68     | 0.78      | 0.032      |
| Europe West        | 0.72     | 0.72      | >0.05      |
| Iberian Peninsula  | 0.38     | 0.93      | >0.05      |
| European Jewish    | 1.06     | 0.75      | >0.05      |
| Finland/NW Russia  | -1.19    | 1.04      | >0.05      |
| Sub-Saharan Africa | -1.05    | 0.75      | >0.05      |
| Near East          | 0.12     | 1.97      | >0.05      |
| Latino             | 1.18     | 0.79      | >0.05      |

r : 0.056  
 F-statistic: 42.17  
 df: 186129  
 p value: <2.2E-16

**S Table 2:** Correlation of Paternal Lifespan with Estimate of Ancestral Admixture. Description of results as in S Table 1.

| Trait    | Cohort             | N samples | N variants, |        | Bonf. p value | LDSC: N variants | LDSC: intercept | LDSC:       |
|----------|--------------------|-----------|-------------|--------|---------------|------------------|-----------------|-------------|
|          |                    |           | GWAS        | Lambda |               |                  |                 | mean chi-sq |
| Lifespan | Maternal 1886-1918 | 133203    | 540852      | 1.030  | 9.24E-08      | 385494           | 1.01 (0.01)     | 1.033       |
| Lifespan | Maternal 1886-1940 | 270548    | 541493      | 1.113  | 9.23E-08      | 390429           | 1.01 (0.01)     | 1.097       |
| Lifespan | Paternal 1886-1918 | 167179    | 541017      | 1.084  | 9.24E-08      | 385494           | 1.00 (0.01)     | 1.085       |
| Lifespan | Paternal 1886-1940 | 309383    | 541614      | 1.182  | 9.23E-08      | 390429           | 0.991 (0.01)    | 1.161       |
| Age      | Male+Female        | 482068    | 536775      | 1.374  | 9.31E-08      | 390622           | 1.04 (0.02)     | 1.286       |

**S Table 3:** Summary statistics for GWA mapping analyses. Lambda is the median genomic variance inflation factor. LD Score regression (LDSC) summary statistics: intercept and mean chi-sq values.

| Lifespan | Cohort | Locus    | RSID       | beta_snp | beta_snp_se | p_val_snp | beta_chip | beta_chip_se | p_val_chip |
|----------|--------|----------|------------|----------|-------------|-----------|-----------|--------------|------------|
| Father   | 1918   | ANRIL    | rs1333042  | 0.324    | 0.045       | 4.011E-13 | 0.043     | 0.063        | 0.495      |
| Father   | 1918   | WAPL     | rs10887623 | -0.418   | 0.075       | 2.261E-08 | 0.040     | 0.063        | 0.529      |
| Father   | 1940   | ANRIL    | rs1333042  | 0.248    | 0.032       | 6.999E-15 | 0.011     | 0.045        | 0.806      |
| Father   | 1940   | LPA      | rs9457925  | -0.828   | 0.119       | 4.142E-12 | 0.011     | 0.045        | 0.812      |
| Father   | 1940   | SRRM3    | rs17685    | 0.194    | 0.036       | 5.414E-08 | 0.011     | 0.045        | 0.804      |
| Father   | 1940   | CHRNA3/5 | rs931794   | -0.198   | 0.033       | 3.194E-09 | 0.012     | 0.045        | 0.788      |
| Mother   | 1918   | APOE     | rs4420638  | -0.320   | 0.066       | 4.825E-06 | -0.061    | 0.070        | 0.387      |
| Mother   | 1940   | APOE     | rs4420638  | -0.241   | 0.044       | 5.941E-08 | -0.081    | 0.048        | 0.091      |

**S. Table 4:** The effect of the focal SNP and chip version covariate in GWA mapping models for candidate lifespan variants.

| Trait             | Locus | RSID       | Chr | Assoc. Model              | Effect (years) | SE (years) | P        |
|-------------------|-------|------------|-----|---------------------------|----------------|------------|----------|
| Paternal Lifespan | ANRIL | rs1333042  | 9   | Primary                   | 0.64834        | 0.08936    | 4.01E-13 |
|                   |       |            |     | Primary + Med. Ls./Cohort | 0.64820        | 0.08934    | 4.02E-13 |
|                   | WAPL  | rs10887623 | 10  | Primary                   | -0.83683       | 0.14970    | 2.26E-08 |
|                   |       |            |     | Primary + Med. Ls./Cohort | -0.83580       | 0.14966    | 2.34E-08 |
| Maternal Lifespan | APOE  | rs4420638  | 19  | Primary                   | -0.60198       | 0.13165    | 4.83E-06 |
|                   |       |            |     | Primary + Med. Ls./Cohort | -0.63940       | 0.13220    | 1.33E-06 |

**S. Table 5:** – Candidate variants for GWA mapping of maternal and paternal lifespan in 1886-1918 birth cohort. We ran two versions of the association mapping model: 1) primary model, which includes the PCs 1-10 and chip version as covariates and 2) primary model with an additional covariate for the median lifespan per birth cohort within the years: 1886-1918.

| Cohort      | Analysis     | Locus  | RSID      | Chr | Effect Allele | Effect Allele | Odds Ratio / Beta (Yrs.) | SE   | P <sub>UC</sub> | P <sub>GC</sub> |     |
|-------------|--------------|--------|-----------|-----|---------------|---------------|--------------------------|------|-----------------|-----------------|-----|
| Male        | Case/Control | APOE   | rs4420638 | 19  | G             | 0.18          | 0.82                     | 0.02 | 1.03E-25        | 2.67E-24        | *** |
| Female      | Case/Control | MAP2K6 | rs817555  | 17  | A             | 0.45          | 0.93                     | 0.01 | 2.39E-08        | 9.84E-08        | *   |
| Female      | Case/Control | APOE   | rs4420638 | 19  | G             | 0.18          | 0.77                     | 0.02 | 4.70E-49        | 6.86E-45        | *** |
| Male+Female | Case/Control | APOE   | rs4420638 | 19  | G             | 0.18          | 0.79                     | 0.01 | 1.34E-71        | 1.02E-62        | *** |
| Male+Female | Quantitative | APOE   | rs769449  | 19  | A             | 0.12          | -0.74                    | 0.04 | 5.48E-74        | 2.35E-54        | *** |

**S. Table 6:** Candidate loci associated with current age in both case/control and quantitative trait GWA analyses. The additive effect of each locus for case/control analyses is given as an odds ratio and as an effect on years of current age for the quantitative analysis. The statistical significance of the association at each candidate variant is given as an uncorrected (P<sub>UC</sub>) value and genomic control corrected (P<sub>GC</sub>) value. Significance of P<sub>GC</sub> after Bonferroni multiple test correction: \*\*\* P<sub>Bonf</sub> < 0.001; \* P<sub>Bonf</sub> < 0.05; - P<sub>Bonf</sub> > 0.05.

| p1            | p2            | rg     | rg_se  | p_value  | p1_h2_obs |        | p1_h2_int |        | p2_h2_obs |        | p2_h2_int |        | gcov_int | gcov_int_se |
|---------------|---------------|--------|--------|----------|-----------|--------|-----------|--------|-----------|--------|-----------|--------|----------|-------------|
| ukbb_paternal | ukbb_maternal | 0.9017 | 0.0604 | 2.15E-50 | 0.092     | 0.0066 | 1.0394    | 0.0123 | 0.0514    | 0.0054 | 1.0693    | 0.0113 | 0.0804   | 0.0084      |
| ukbb_paternal | anc_paternal  | 0.975  | 0.0575 | 1.72E-64 | 0.0926    | 0.0068 | 1.0381    | 0.0124 | 0.0804    | 0.0064 | 0.992     | 0.0111 | -0.0275  | 0.0081      |
| ukbb_maternal | anc_paternal  | 0.8779 | 0.0755 | 3.16E-31 | 0.0514    | 0.0054 | 1.0693    | 0.0114 | 0.0804    | 0.0064 | 0.992     | 0.0111 | -0.0174  | 0.0076      |
| ukbb_paternal | anc_maternal  | 0.8919 | 0.08   | 7.40E-29 | 0.0922    | 0.0068 | 1.0387    | 0.0124 | 0.045     | 0.0072 | 1.0163    | 0.0114 | -0.0113  | 0.0075      |
| ukbb_maternal | anc_maternal  | 1.0166 | 0.1126 | 1.76E-19 | 0.0514    | 0.0054 | 1.0694    | 0.0112 | 0.045     | 0.0072 | 1.0163    | 0.0114 | -0.0152  | 0.0084      |
| anc_paternal  | anc_maternal  | 0.8769 | 0.087  | 7.07E-24 | 0.0808    | 0.006  | 0.9911    | 0.0107 | 0.0462    | 0.0072 | 1.0129    | 0.011  | 0.0837   | 0.0067      |

**S. Table 7:** Genetic correlation analysis between *AncestryDNA* parental lifespan GWA and UKB attained age GWA. Genetic correlation: rg. P value significance of genetic correlation: p\_value. Heritability: h2\_obs. Intercept for heritability estimate: h2\_int. Genetic covariance intercept: gcov\_int.

**S. Table 8 (separate file):** A representative list of SNPs from *AncestryDNA* age and parental lifespan GWA studies with genomic control adjusted p-values less than  $3.0 \times 10^{-3}$ . This table includes: the rsid name, chromosome position in hg19, effect allele, number of samples included in the association analysis, the z score transformed beta effect size, standard error estimate for beta, the raw p-value and the p-value after genomic control. Note, the effect sizes for lifespan traits have not been re-scaled (doubled) to reflect allelic dosage in parental generation.

**S. Table 9 (separate file):** A representative list of SNPs from the meta-analysis between the *AncestryDNA* and UKB parental lifespan GWA studies with p-values less than  $2.5 \times 10^{-3}$ . This table includes: the rsid name, chromosome position in hg19, effect allele, meta-analysis p-value, meta-analysis sample size, the study-specific p-value, z score transformed beta effect size, and standard error estimate for beta for both the *AncestryDNA* and UKB studies. Some of the SNPs included in the meta-analysis were imputed in the *AncestryDNA* dataset, these are denoted with im:<position>. Note, genomic control has not been applied to the p-value for the *AncestryDNA* analysis and the beta effect size for lifespan traits have not been re-scaled (doubled) to reflect allelic dosage in parental generation.



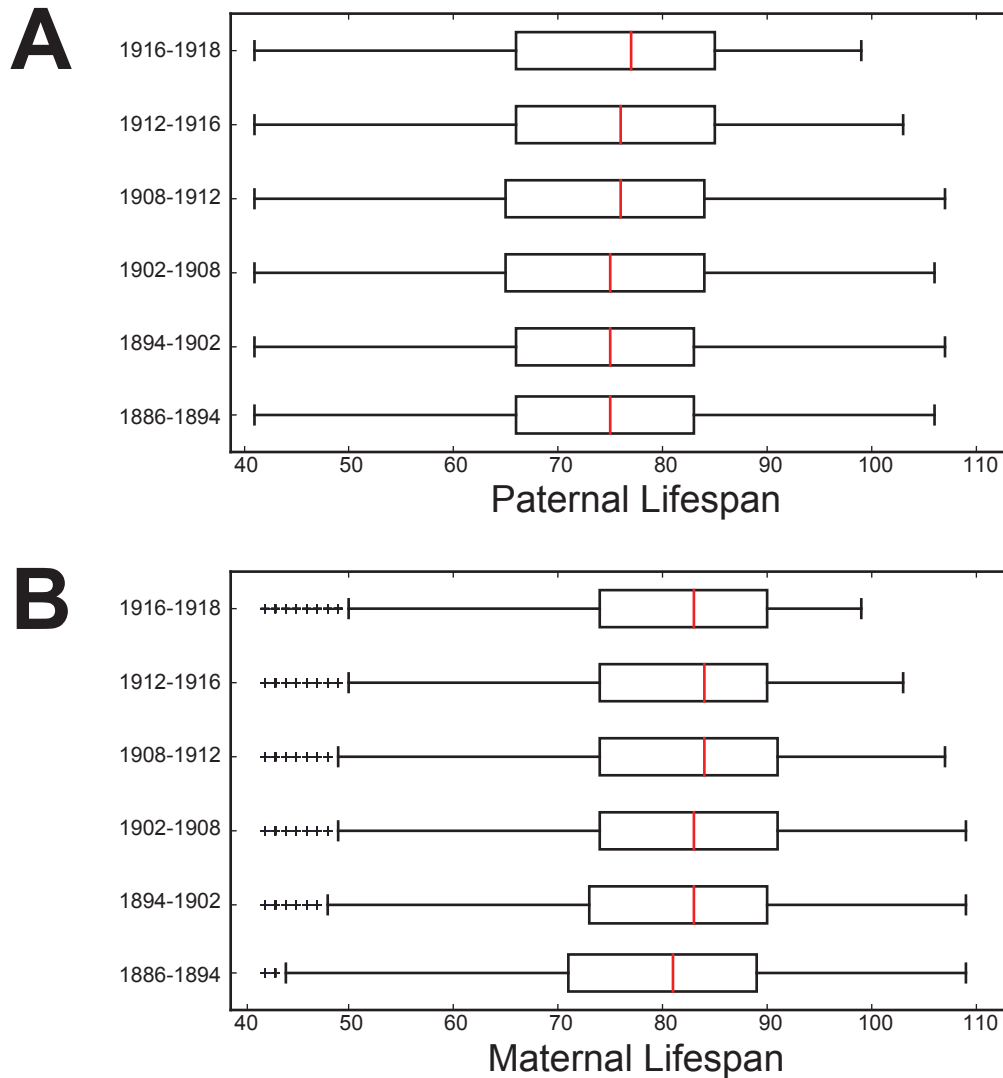

**S. Figure 1** – Box plots show the change in paternal (A) and maternal (B) lifespan in birth cohorts ranging from 1886 to 1918. Boxes show the inner and outer quartile range, with the median lifespan depicted as a red line. Whiskers span the 2.5%-97.5% range and outliers are noted with a '+' symbol.

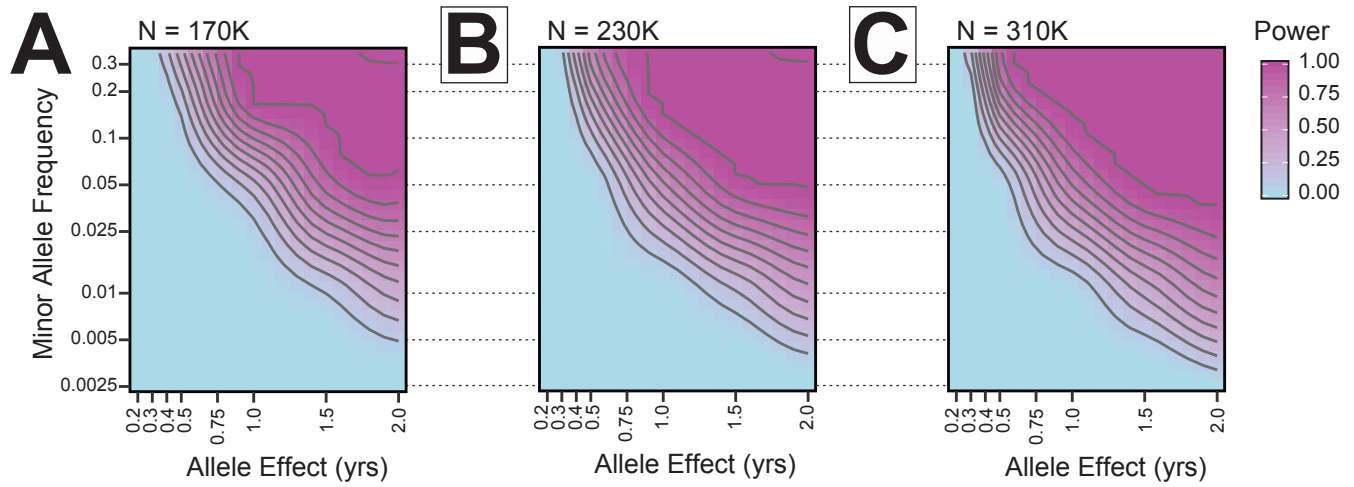

**S. Figure 2** – Power calculations for lifespan analysis with mapping population size of: (A) 170,000, (B) 230,000 and (C) 310,000 individuals.

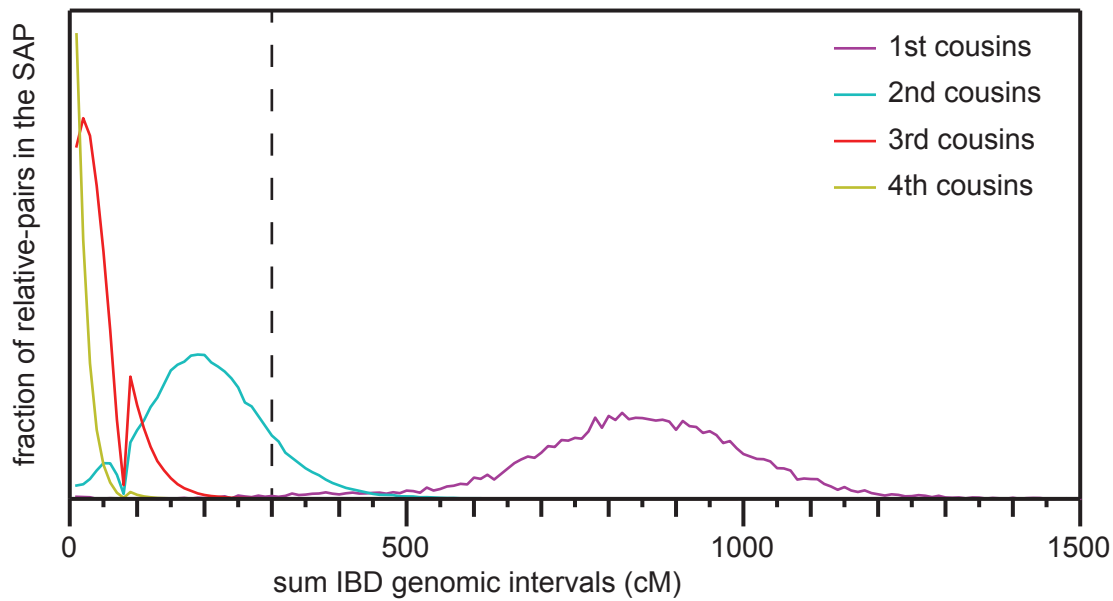

**S. Figure 3** – Distribution of genome wide measure of identity-by-decent (IBD) for 1<sup>st</sup>-4<sup>th</sup> cousins in the SAP. IBD measurements binned into 10cM intervals. The skew in the distribution at <90 cM IBD caused by 'Timber' filtering of small and widely shared genomic intervals, see methods. Dashed line at 300cM is the threshold to remove close relatives in GWA mapping analyses.

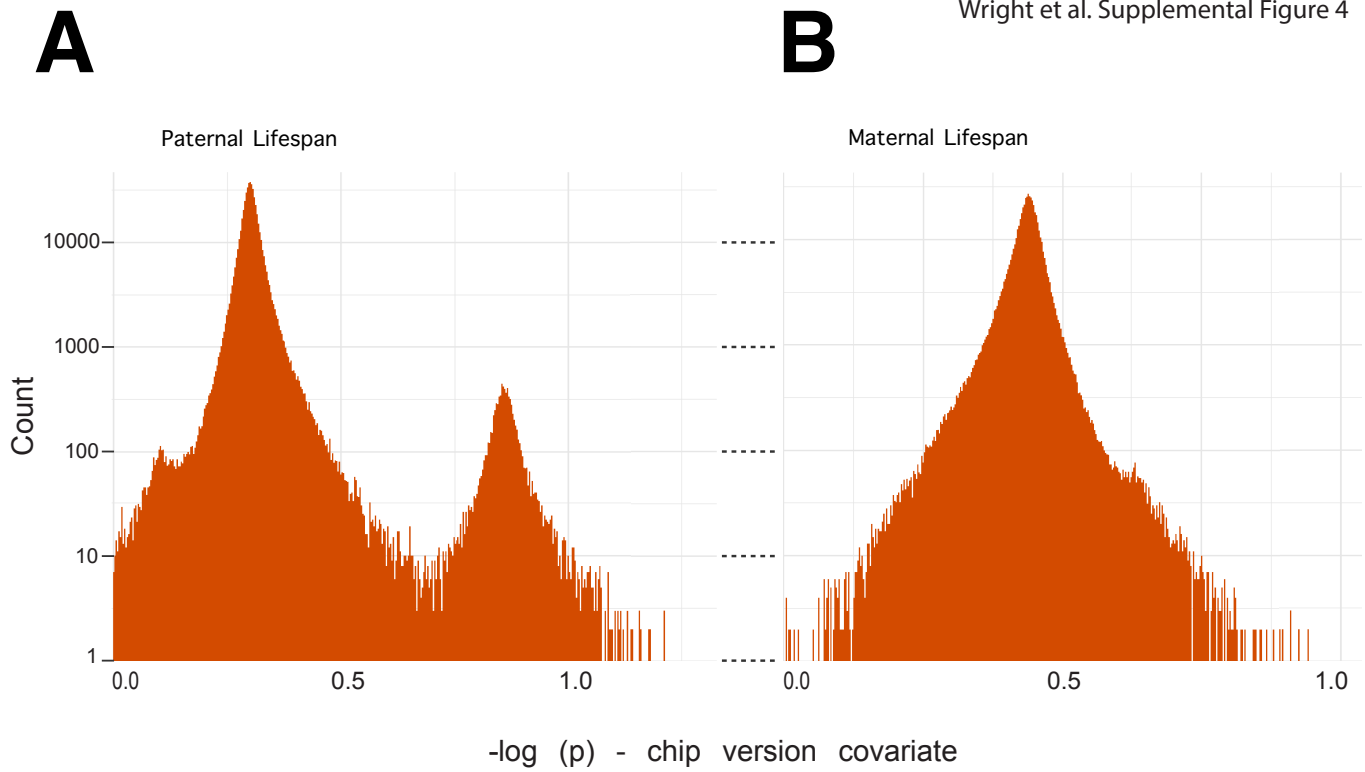

**S. Figure 4** – Histogram of p-values for chip version covariate in GWA mapping model of **(A)** paternal lifespan and **(B)** maternal lifespan from 1886-1918 cohort.

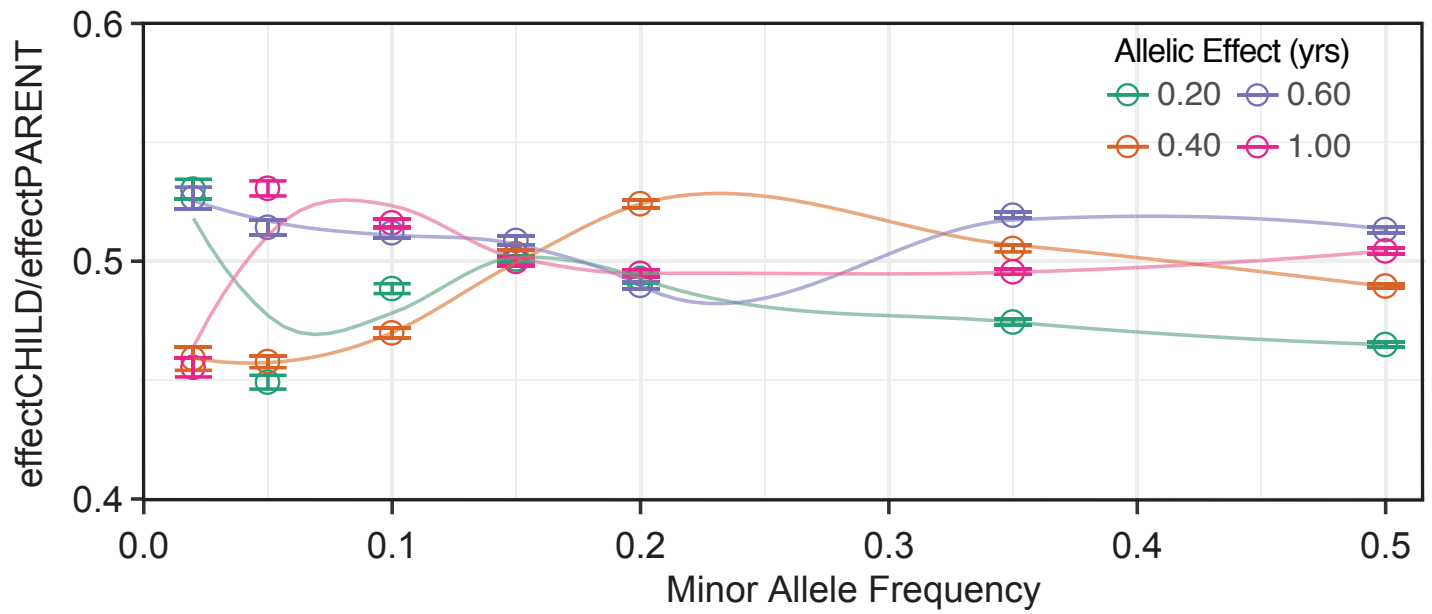

**S. Figure 5** – Ratio of mutation effect size estimated using genotype of children versus genotype of parents. Plot means ( $\pm$  95% CI) from 50 replicate simulations per parameter combination.

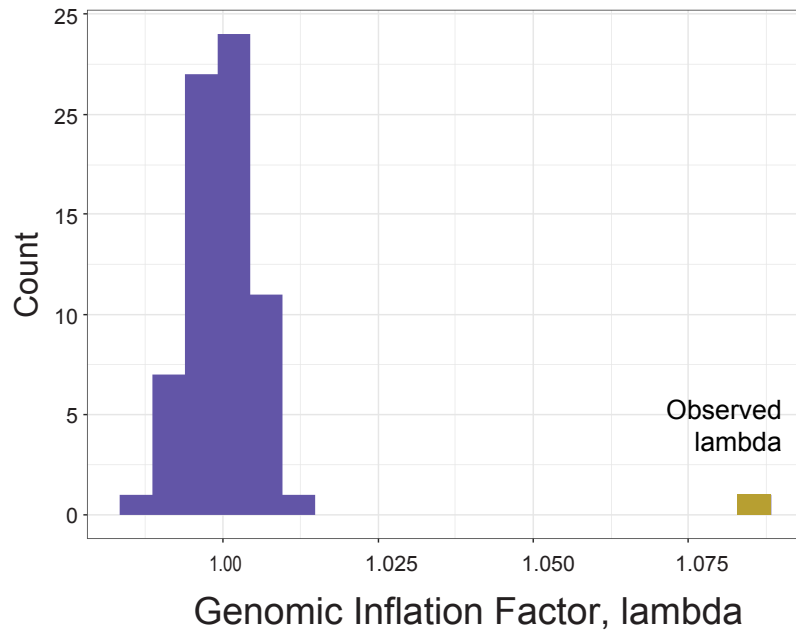

**S. Figure 6** – Histogram of genomic inflation factors,  $\lambda$ , from randomly permuted lifespan values from paternal lifespan dataset, 1886-1918 cohort, noted with purple colored bars. The gold colored bar is the observed  $\lambda$  value for this cohort.

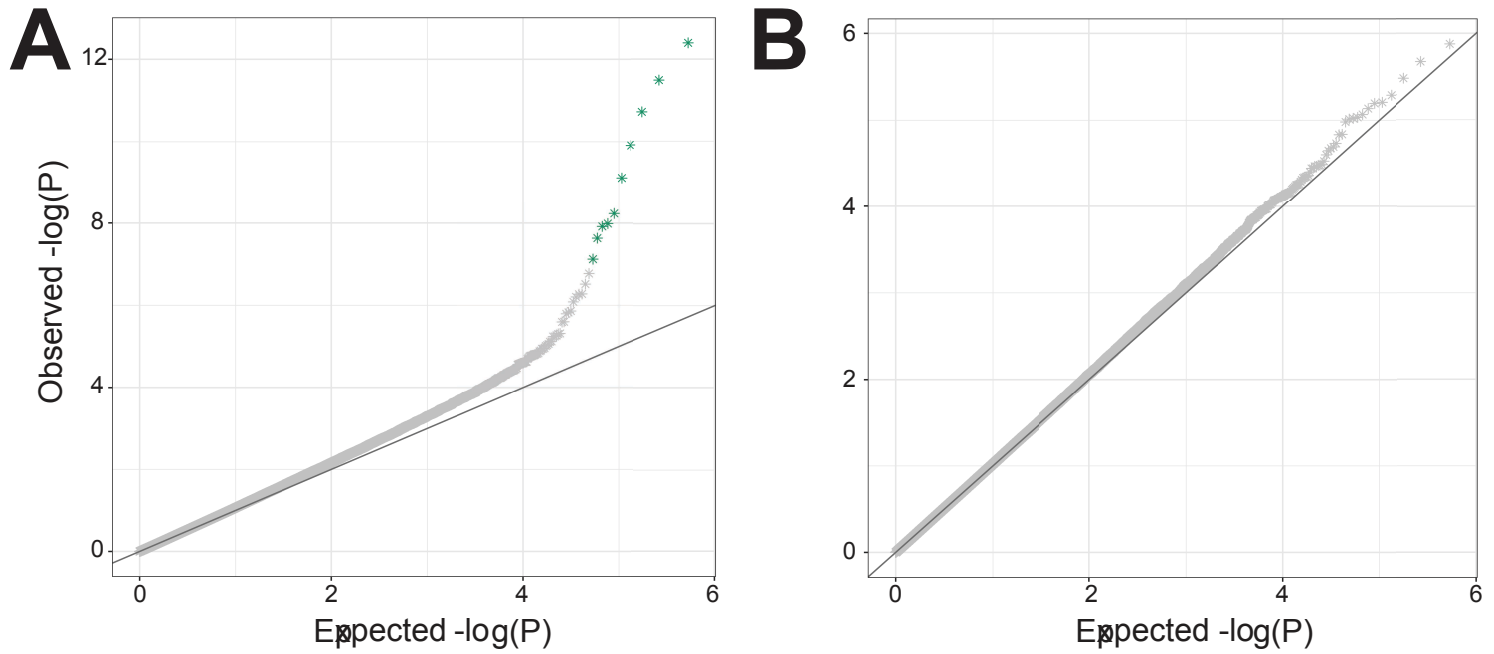

**S. Figure 7** – QQ plot of p values for variants associated with lifespan in GWA mapping models with an additional covariate for the median lifespan per birth cohort for (A) fathers and (B) mothers born between 1886 and 1918. These QQ plots are analogous to Figure 3A-B, which depict results from GWA mapping models with chip version and PC1-10 were the only covariates.

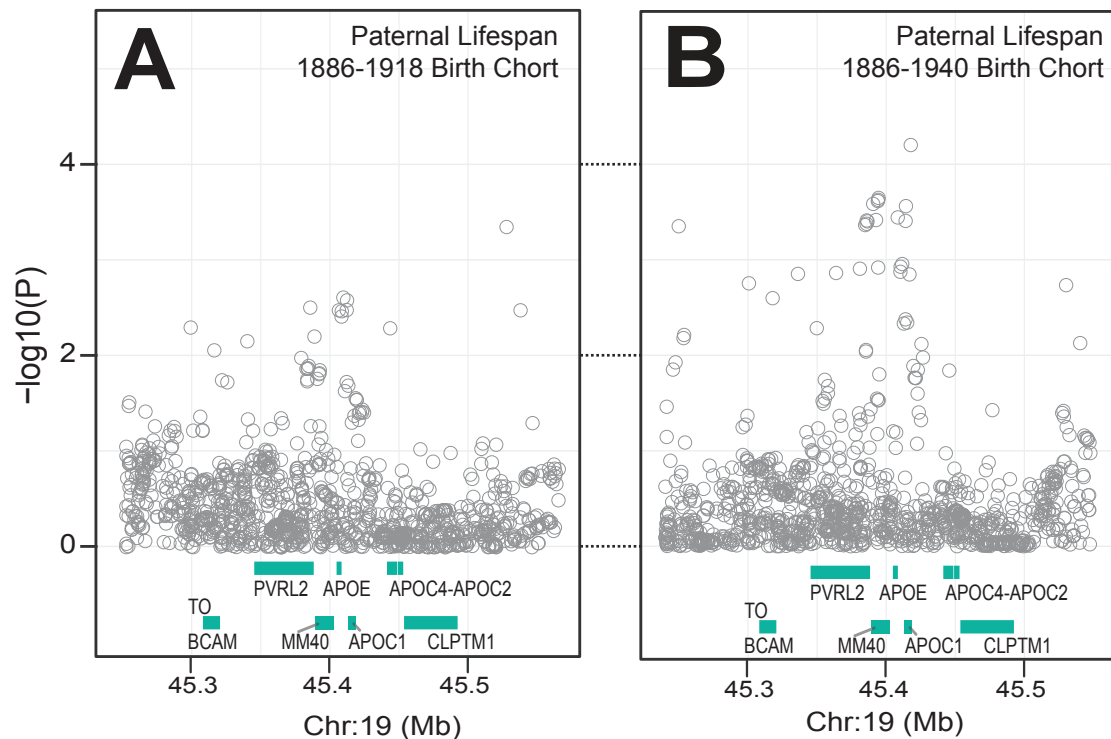

**S. Figure 8** –Manhattan plot of association test statistics from analyses of paternal lifespan: (A) cohort 1886-1918 and (B) cohort 1886-1940. Association analysis using imputed data at APOE locus. Solid red circle are SNPs with Bonferroni corrected p-values less than 0.05. Cyan bars: hg19 gene models.

Next page:

**S. Figure 9** – Manhattan plot of GWA analysis of lifespan in 1886-1918 birth cohort: (A) paternal; Sub-Saharan Africa, (B) paternal; East Asian/Native American, (C) maternal; Sub-Saharan Africa, and (D) maternal; East Asian/Native American population groups. GWA Analysis of 1886-1940 birth cohorts: (E) paternal; Sub-Saharan Africa, (F) paternal; East Asian/Native American, (G) maternal; Sub-Saharan Africa, and (H) maternal; East Asian/Native American population groups.



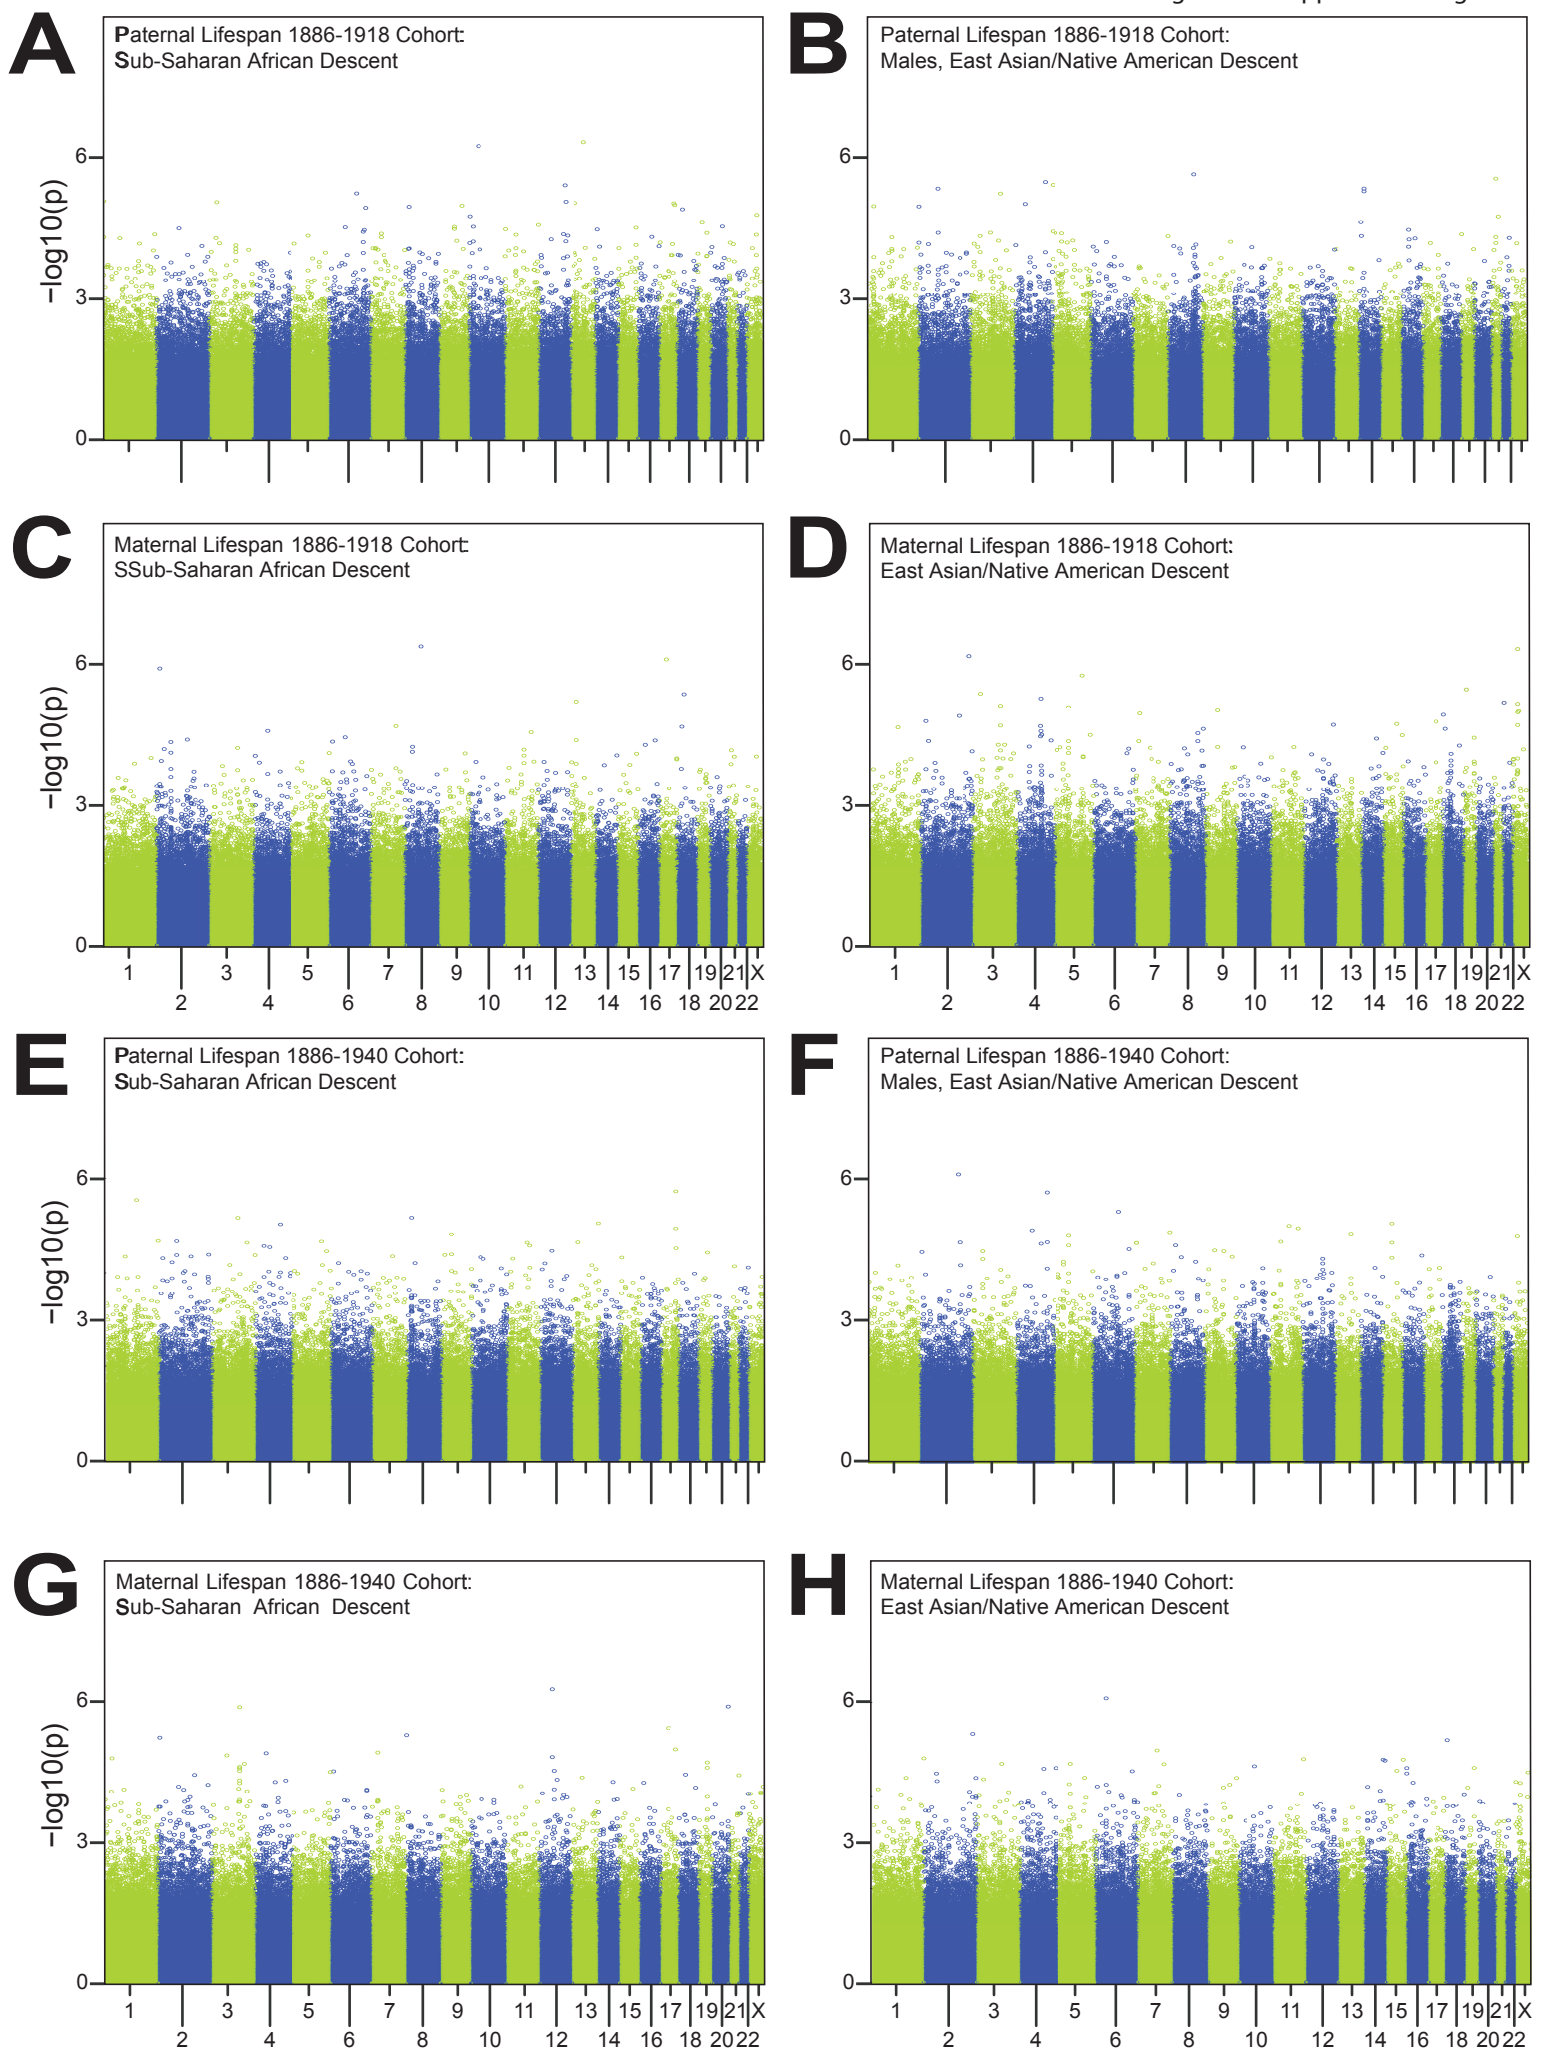

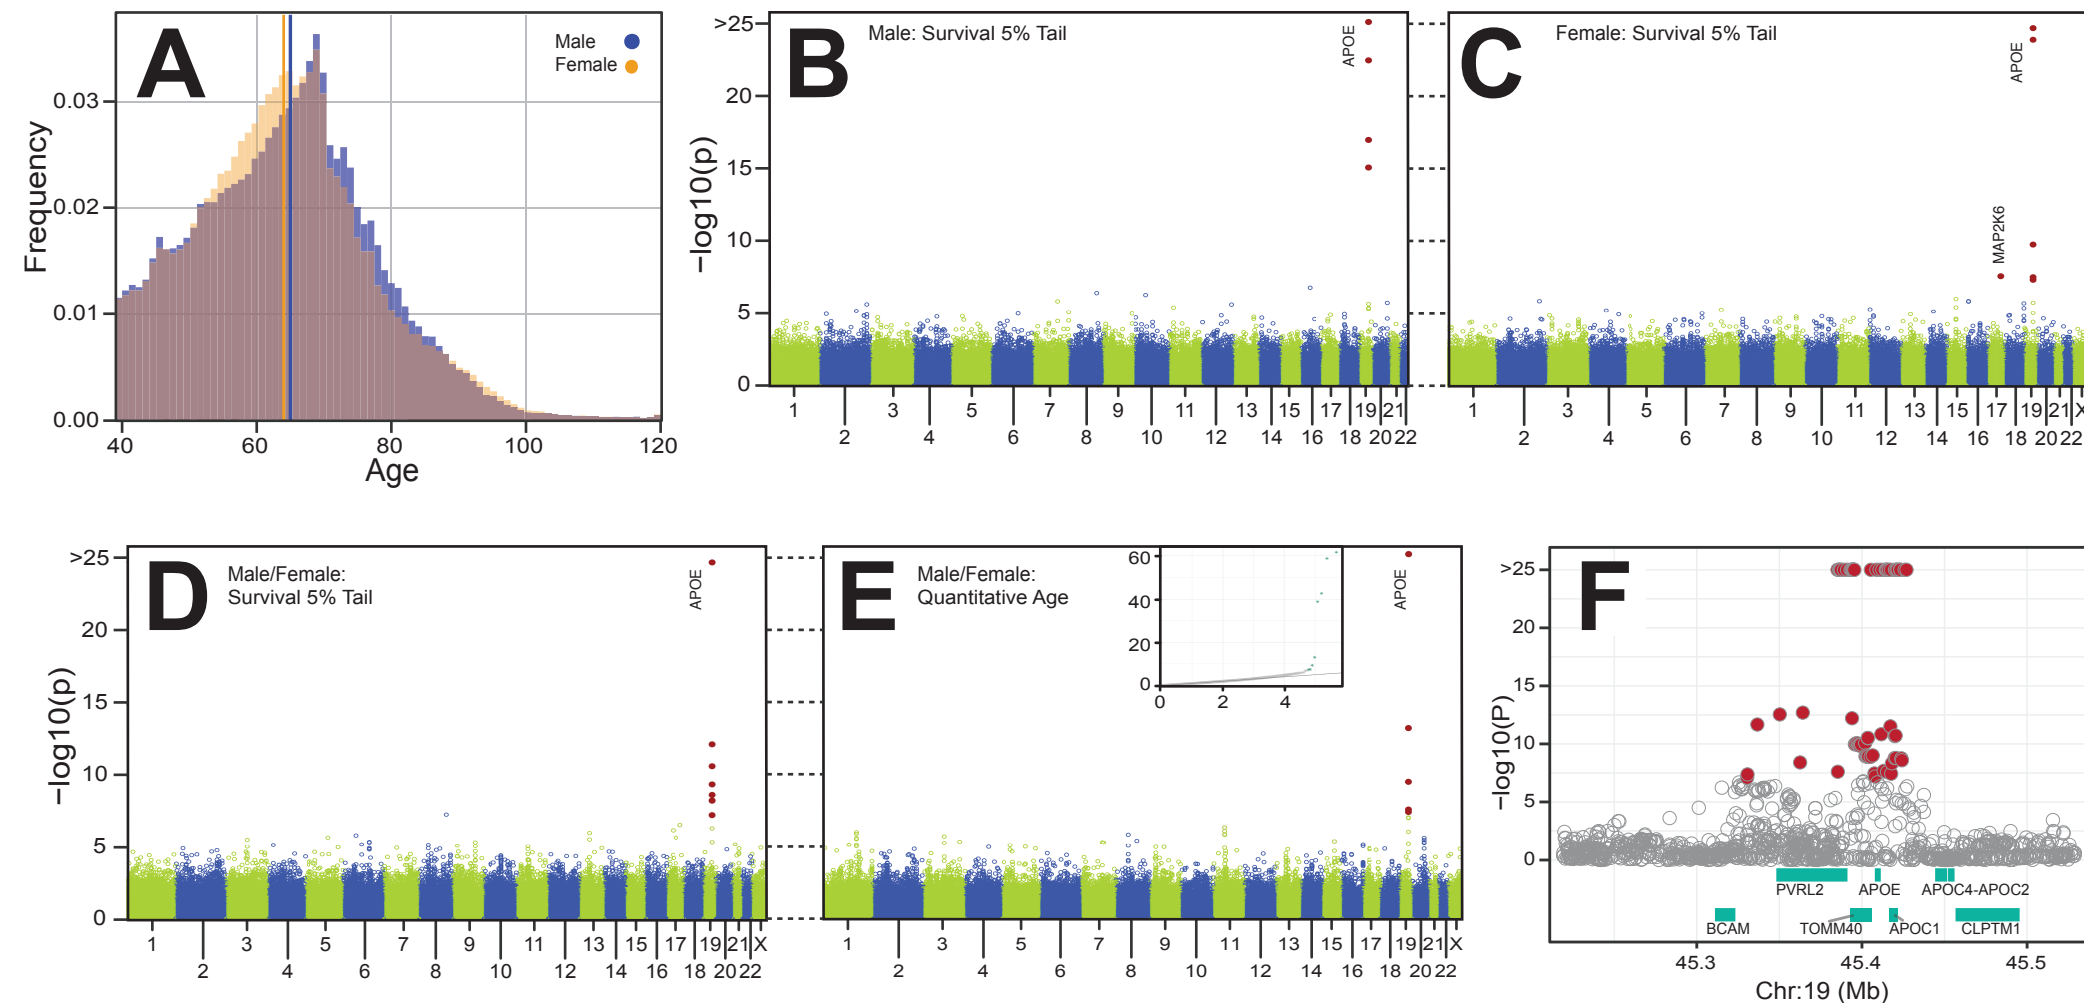

**S. Figure 10** – (A) Distribution of the age of genotyped men and women in 2016. Median values noted with colored vertical lines. paternal individuals are denoted with blue, maternal individuals with orange, and overlapping values are dark orange. Manhattan plots of GWA results for case/control analyses of survival to 5% of age distribution: (B) male, (C) female, and (D) combine male and female. (E) Manhattan plot of quantitative trait GWA results for the current age of all individuals, both men and women, between the ages 40-120. (F) Association analysis with imputed genotypes at APOE locus. Annotation details are the same as in Figure 3.
